# Supplementary material
Source: PubMed Central journal article supplement (PMC9052108)
Supplement: jamaoncol-e220615-s002.pdf [file jamaoncol-e220615-s002.pdf]

## Supplemental Online Content

Palma DA, Prisman E, Berthelet E, et al. Assessment of toxic effects and survival in treatment deescalation with radiotherapy vs transoral surgery for HPV-associated oropharyngeal squamous cell carcinoma: the ORATOR2 phase 2 randomized clinical trial. *JAMA Oncol*. Published online April 28, 2022. doi:10.1001/jamaoncol.2022.0615

**eTable 1.** Quality of life scores

**eTable 2.** Follow-up hematologic findings

**eAppendix.** Patients who did not receive protocol treatment

This supplemental material has been provided by the authors to give readers additional information about their work.

**eTable 1.** Quality of life scores and clinically meaningful decline at 1-year by instrument and domain.

| Variable                                         | RT Arm (n=30)<br>Mean ± SD | TOS + ND Arm (n=31)<br>Mean ± SD | P-value | RT Arm (n=30)<br>% <sup>1</sup> | TOS + ND Arm (n=31)<br>% <sup>1</sup> | P-value |
|--------------------------------------------------|----------------------------|----------------------------------|---------|---------------------------------|---------------------------------------|---------|
| <b>MD Anderson Dysphagia Inventory (MDADI)</b>   |                            |                                  |         |                                 |                                       |         |
| Global                                           | 86.3 ± 18.9                | 87.5 ± 17.7                      | 0.85    | 18.8                            | 31.3                                  | 0.69    |
| Emotional                                        | 84.9 ± 16.6                | 84.8 ± 14.9                      | 0.98    | 6.3                             | 18.8                                  | 0.60    |
| Functional                                       | 87.3 ± 14.9                | 88.8 ± 13.3                      | 0.77    | 13.3                            | 25.0                                  | 0.65    |
| Physical                                         | 85.0 ± 16.8                | 81.7 ± 17.9                      | 0.59    | 20.0                            | 43.8                                  | 0.25    |
| Total                                            | 85.7 ± 15.6                | 84.7 ± 14.5                      | 0.85    | 6.7                             | 25.0                                  | 0.33    |
| Composite (Excl. Global)                         | 85.7 ± 15.6                | 84.5 ± 14.5                      | 0.83    | 6.7                             | 25.0                                  | 0.33    |
| <b>EORTC Core 30</b>                             |                            |                                  |         |                                 |                                       |         |
| Global Health Status                             | 79.4 ± 20.3                | 87.0 ± 17.2                      | 0.24    | 31.3                            | 12.5                                  | 0.39    |
| Physical Functioning                             | 6.3 ± 10.5                 | 5.4 ± 12.5                       | 0.82    | 25.0                            | 12.5                                  | 0.65    |
| Role Functioning                                 | 10.5 ± 15.9                | 6.3 ± 14.8                       | 0.42    | 31.3                            | 18.8                                  | 0.69    |
| Emotional Functioning                            | 13.6 ± 17.8                | 5.2 ± 8.0                        | 0.077   | 6.3                             | 6.3                                   | > 0.99  |
| Cognitive Functioning                            | 6.1 ± 11.4                 | 3.1 ± 6.7                        | 0.34    | 12.5                            | 12.5                                  | > 0.99  |
| Social Functioning                               | 4.4 ± 15.6                 | 4.2 ± 11.4                       | 0.96    | 12.5                            | 12.5                                  | > 0.99  |
| Fatigue                                          | 16.4 ± 21.1                | 12.5 ± 14.6                      | 0.53    | 31.3                            | 37.5                                  | 0.71    |
| Nausea and Vomiting                              | 0.0                        | 1.0 ± 4.2                        | 0.33    | 0.0                             | 6.3                                   | > 0.99  |
| Pain                                             | 11.4 ± 13.7                | 9.4 ± 21.9                       | 0.75    | 25.0                            | 18.8                                  | > 0.99  |
| Dyspnea                                          | 1.8 ± 7.6                  | 8.3 ± 14.9                       | 0.13    | 6.3                             | 6.7                                   | > 0.99  |
| Insomnia                                         | 10.5 ± 19.4                | 20.8 ± 24.0                      | 0.18    | 18.8                            | 31.3                                  | 0.69    |
| Appetite Loss                                    | 3.5 ± 15.3                 | 8.3 ± 14.9                       | 0.35    | 6.3                             | 25.0                                  | 0.33    |
| Constipation                                     | 3.5 ± 10.5                 | 8.3 ± 14.9                       | 0.29    | 0.0                             | 12.5                                  | 0.48    |
| Diarrhea                                         | 0.0                        | 0.0                              | --      | 0.0                             | 0.0                                   | --      |
| Financial Difficulties                           | 8.8 ± 21.8                 | 10.4 ± 29.1                      | 0.85    | 6.3                             | 12.5                                  | > 0.99  |
| <b>EORTC Head-and-Neck 35</b>                    |                            |                                  |         |                                 |                                       |         |
| Pain                                             | 9.6 ± 12.5                 | 13.5 ± 23.1                      | 0.55    | 18.8                            | 12.5                                  | > 0.99  |
| Swallowing                                       | 7.6 ± 9.2                  | 7.3 ± 12.9                       | 0.94    | 18.8                            | 18.8                                  | > 0.99  |
| Senses                                           | 21.1 ± 21.4                | 12.5 ± 15.5                      | 0.18    | 56.3                            | 37.5                                  | 0.29    |
| Speech                                           | 9.4 ± 13.0                 | 7.6 ± 13.3                       | 0.70    | 25.0                            | 25.0                                  | > 0.99  |
| Social Eating                                    | 6.6 ± 12.0                 | 9.9 ± 16.4                       | 0.51    | 6.3                             | 25.0                                  | 0.33    |
| Social Contact                                   | 6.3 ± 11.2                 | 2.1 ± 6.8                        | 0.18    | 25.0                            | 6.3                                   | 0.33    |
| Less Sexuality                                   | 15.7 ± 22.5                | 7.1 ± 19.3                       | 0.25    | 20.0                            | 16.7                                  | > 0.99  |
| Teeth                                            | 5.3 ± 12.5                 | 10.4 ± 20.1                      | 0.38    | 6.3                             | 18.8                                  | 0.60    |
| Opening Mouth                                    | 7.0 ± 14.0                 | 25.0 ± 33.3                      | 0.058   | 25.0                            | 31.3                                  | > 0.99  |
| Dry Mouth                                        | 38.6 ± 29.9                | 29.2 ± 20.6                      | 0.28    | 43.8                            | 43.8                                  | > 0.99  |
| Sticky Saliva                                    | 17.5 ± 23.2                | 22.9 ± 23.5                      | 0.50    | 12.5                            | 37.5                                  | 0.22    |
| Coughing                                         | 10.5 ± 15.9                | 27.1 ± 21.8                      | 0.018   | 6.3                             | 37.5                                  | 0.083   |
| Felt Ill                                         | 3.5 ± 10.5                 | 4.2 ± 11.4                       | 0.86    | 0.0                             | 13.3                                  | 0.23    |
| Pain Killers                                     | 15.8 ± 37.5                | 25.0 ± 44.7                      | 0.52    | 12.5                            | 12.5                                  | > 0.99  |
| Nutritional Suppl.                               | 26.3 ± 45.2                | 37.5 ± 50.0                      | 0.50    | 18.8                            | 25.0                                  | > 0.99  |
| Feeding Tube                                     | 0.0                        | 0.0                              | --      | 0.0                             | 0.0                                   | --      |
| Weight Loss                                      | 0.0                        | 25.0 ± 44.7                      | 0.041   | 0.0                             | 12.5                                  | 0.48    |
| Weight Gain                                      | 47.4 ± 51.3                | 37.5 ± 50.0                      | 0.57    | 37.5                            | 31.3                                  | 0.71    |
| <b>Voice Handicap Index (VHI-10)</b>             |                            |                                  |         |                                 |                                       |         |
| Total                                            | 2.9 ± 5.2                  | 3.7 ± 5.7                        | 0.69    | 0.0                             | 6.3                                   | 0.49    |
| <b>Neck Dissection Impairment Index (NDII)</b>   |                            |                                  |         |                                 |                                       |         |
| Total                                            | 88.3 ± 15.4                | 94.5 ± 8.5                       | 0.14    | 7.1                             | 26.7                                  | 0.33    |
| <b>EuroQoL 5-Dimension 5-Level (EQ-5D-5L)</b>    |                            |                                  |         |                                 |                                       |         |
| Health State                                     | 82.4 ± 14.7                | 86.9 ± 14.3                      | 0.37    | 31.3                            | 12.5                                  | 0.39    |
| Index                                            | 0.91 ± 0.06                | 0.91 ± 0.08                      | 0.83    | 0.0                             | 6.3                                   | > 0.99  |
| <b>Patient Neurotoxicity Questionnaire (PNQ)</b> |                            |                                  |         |                                 |                                       |         |
| Numbness                                         | 0.8 ± 1.1                  | 0.4 ± 0.7                        | 0.37    | 14.3                            | 0.0                                   | 0.50    |

|          |           |           |      |     |     |    |
|----------|-----------|-----------|------|-----|-----|----|
| Weakness | 0.1 ± 0.4 | 0.3 ± 0.7 | 0.47 | 0.0 | 0.0 | -- |
|----------|-----------|-----------|------|-----|-----|----|

**RT** – Radiotherapy; **TOS + ND** – Trans-oral surgery and neck dissection; **EORTC** – European Organization for Research and Treatment of Cancer; <sup>1</sup>Defined as decrease of at least 10 points (EORTC Core 30 Global Health Status and MDADI), decrease of at least 0.1 points (EQ-5D-5L Index) or increase of at least 10 points for all other items compared to baseline (PNQ reported as “severe” proportion)

**eTable 2.** Follow-up hematologic findings.

| <b>Characteristic</b>                     | <b>All Patients<br/>(n=61)</b> | <b>RT Arm<br/>(n=30)</b> | <b>TOS + ND Arm<br/>(n=31)</b> | <b>P-<br/>value</b> |
|-------------------------------------------|--------------------------------|--------------------------|--------------------------------|---------------------|
| <b>White blood cells</b> – median (IQR)   | 5.50 (4.20, 6.30)              | 5.00 (3.70, 6.30)        | 5.65 (4.40, 6.40)              | 0.71                |
| <b>Neutrophils</b> – median (IQR)         | 3.30 (2.30, 4.50)              | 3.00 (2.30, 4.50)        | 3.60 (2.55, 4.50)              | 0.75                |
| <b>Platelets</b> – median (IQR)           | 195.0 (160.0, 220.0)           | 174.0 (159.0, 199.0)     | 204.5 (190.5, 227.5)           | 0.28                |
| <b>Hemoglobin</b> – median (IQR)          | 139.0 (126.0, 152.0)           | 139.0 (131.0, 144.0)     | 144.0 (124.0, 155.0)           | 0.70                |
| <b>Blood urea nitrogen</b> – median (IQR) | 5.15 (3.90, 6.10)              | 4.00 (3.30, 6.30)        | 5.60 (4.90, 5.90)              | 0.26                |
| <b>Creatinine</b> – median (IQR)          | 87.0 (72.0, 95.0)              | 91.0 (86.0, 96.0)        | 74.0 (66.0, 89.0)              | 0.042               |

RT – Radiotherapy; **TOS + ND** – Trans-oral surgery and neck dissection; **IQR** – Interquartile range

## **eAppendix.**

### **Patients Who Did Not Receive Protocol Treatment**

In the RT arm, this occurred for 1 patient, due to study closure between randomization and initiation of treatment. This patient received standard of care treatment and withdrew from the study. In the TOS+ND arm, this occurred for 4 patients. Of those four, two withdrew study consent prior to treatment, a third was brought to the operating room (OR) and the tumor was found to be inaccessible to TORS; and the fourth was not treated with surgery due to unavailability of OR access shortly after the start of the COVID-19 pandemic. Both of these latter two patients, after discussion with their physicians, opted to receive de-escalated RT. As part of the intention-to-treat analysis, all patients are analyzed in the arm to which they are randomized, but none had any survival or recurrence events. In addition, pandemic-related delays did not appear to negatively affect outcomes, as none of the patients enrolled between Mar-Jun 2020 had recurrence or death events.
