# Supplementary material
Source: PubMed Central journal article supplement (PMC9052108)
Supplement: jamaoncol-e220615-s003.pdf [file jamaoncol-e220615-s003.pdf]

## Data Sharing Statement

Palma. Assessment of Toxic Effects and Survival in Treatment Deescalation With Radiotherapy vs Transoral Surgery for HPV-Associated Oropharyngeal Squamous Cell Carcinoma. *JAMA Oncol*. Published April 28, 2022. doi:10.1001/jamaoncol.2022.0615

### Data

**Data available:** No

### Additional Information

**Explanation for why data not available:** Data from the trial will not be shared publicly as sharing was not included in the ethics approvals.
